# Supplementary material for: Dichloromethane as solvent for the synthesis of polycationic clusters at room temperature – a link to standard organometallic chemistry
Source: Royal Society of Chemistry journal article supplement (doi:10.1039/c0dt00769b), 2010-01-01
Supplement: c0dt00769b.pdf [file c0dt00769b.pdf]

## Electronic Supplementary Information (ESI)

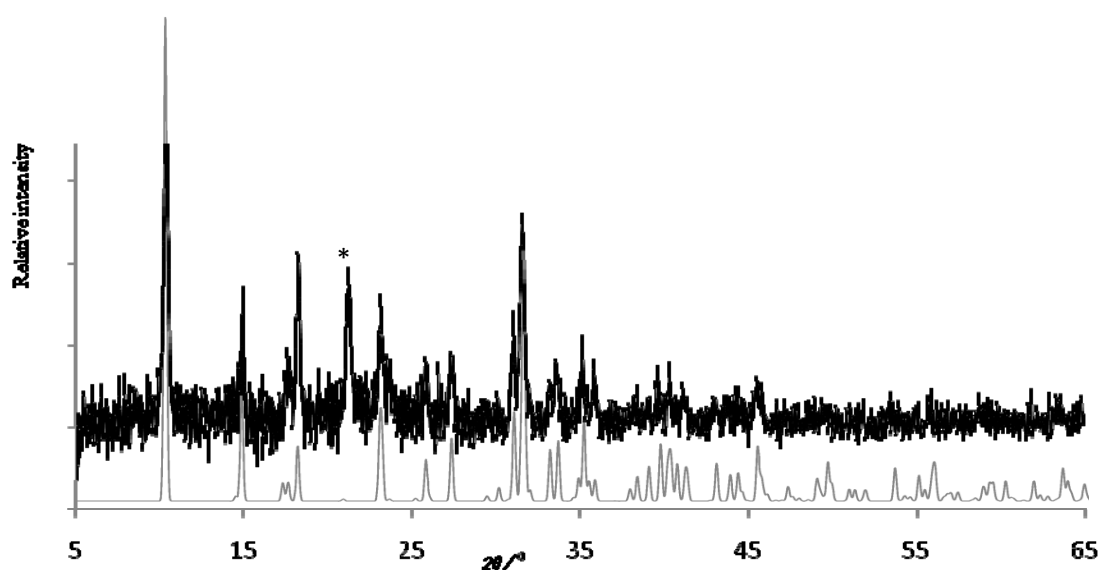

**Fig. S1** Powder diffraction pattern of  $\text{Bi}_5[\text{GaCl}_4]_3$  crystals synthesized from dichloromethane. Observed pattern in black and calculated peak pattern in gray. \* marks the unassigned peak in the diffractogram. This peak cannot be associated with any known reactant and is viewed as a sign of impurity in the sample.

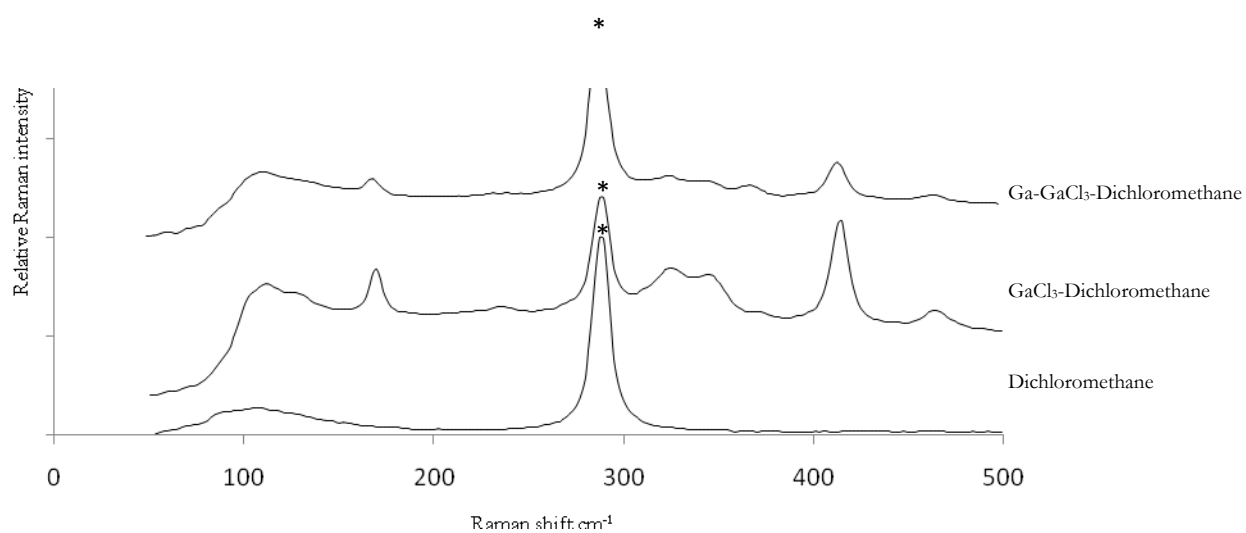

**Fig. S2** Raman spectra below  $500 \text{ cm}^{-1}$  of the liquid  $\text{GaCl}_3$ -dichloromethane and  $\text{Ga-GaCl}_3$ -dichloromethane systems at room-temperature. Pure dichloromethane is shown for reference and the strong solvent band at  $285 \text{ cm}^{-1}$  is marked \*.

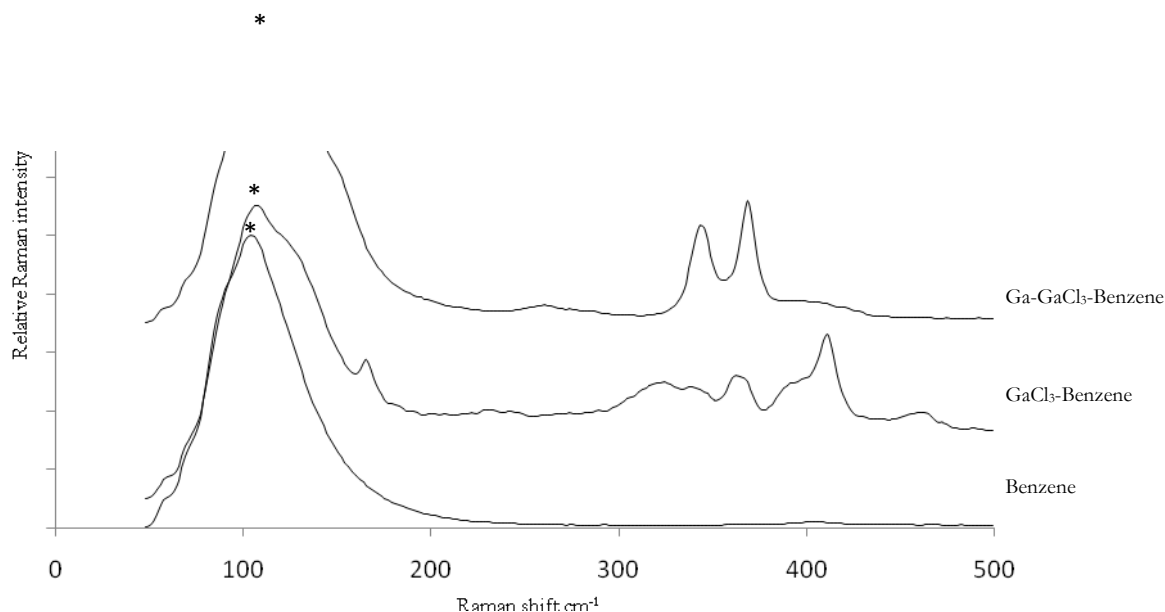

**Fig. S4** Raman spectra below 500  $\text{cm}^{-1}$  of the liquid  $\text{GaCl}_3$ -benzene and  $\text{Ga-GaCl}_3$ -benzene systems at room-temperature. Pure Bz is shown for reference and the strong solvent band at 112  $\text{cm}^{-1}$  is marked \*.

**Table S1** Raman bands ( $\text{cm}^{-1}$ ) of the dichloromethane and benzene system compared with literature data.<sup>[9]</sup>

| $\text{GaCl}_3$ -<br>$\text{C}_6\text{H}_6$<br>Ref. 9a | Assignment               | $\text{Ga-GaCl}_3$ -<br>$\text{C}_6\text{H}_6^*$<br>Ref. 9b | Assignment                                                            | $\text{Ga-GaCl}_3$ -<br>$\text{C}_6\text{H}_6$<br>This work | Assignment                                                      | $\text{Ga-GaCl}_3$ -<br>$\text{CH}_2\text{Cl}_2$<br>This work | Assignment                                                                         |
|--------------------------------------------------------|--------------------------|-------------------------------------------------------------|-----------------------------------------------------------------------|-------------------------------------------------------------|-----------------------------------------------------------------|---------------------------------------------------------------|------------------------------------------------------------------------------------|
| 463                                                    | $\text{Ga}_2\text{Cl}_6$ |                                                             |                                                                       |                                                             |                                                                 | 461                                                           | $\text{Ga}_2\text{Cl}_6$                                                           |
| 413                                                    | $\text{Ga}_2\text{Cl}_6$ | 418                                                         | $\text{Ga}_2\text{Cl}_7^-$                                            |                                                             |                                                                 | 413                                                           | $\text{Ga}_2\text{Cl}_6$                                                           |
| 393                                                    | $\text{GaCl}_3$          | 394                                                         | $\text{Ga}_2\text{Cl}_7^-$                                            |                                                             |                                                                 |                                                               |                                                                                    |
| 367                                                    | $\text{GaCl}_3$          | 370                                                         | $\text{Ga}_2\text{Cl}_7^-$ and<br>$\text{Ga}_3\text{Cl}_{10}^-$       | 368                                                         | $\text{Ga}_2\text{Cl}_7^-$ and<br>$\text{Ga}_3\text{Cl}_{10}^-$ | 370                                                           | $\text{GaCl}_3$ or $\text{Ga}_2\text{Cl}_7^-$<br>and $\text{Ga}_3\text{Cl}_{10}^-$ |
| 344                                                    | $\text{Ga}_2\text{Cl}_6$ | 346                                                         | $\text{GaCl}_4^-$                                                     | 343                                                         | $\text{GaCl}_4^-$                                               | 343                                                           | $\text{Ga}_2\text{Cl}_6$ or $\text{GaCl}_4^-$                                      |
| Obscured                                               | $\text{Ga}_2\text{Cl}_6$ |                                                             |                                                                       |                                                             |                                                                 |                                                               |                                                                                    |
| 325                                                    | Ga-C                     | 260                                                         | $\text{Ga}_2\text{Cl}_7^-$<br>and/or<br>$\text{Ga}_3\text{Cl}_{10}^-$ |                                                             |                                                                 | 322                                                           | Ga-C                                                                               |
| 168                                                    | $\text{Ga}_2\text{Cl}_6$ |                                                             |                                                                       |                                                             |                                                                 | 168                                                           | $\text{Ga}_2\text{Cl}_6$                                                           |
| 140                                                    | $\text{GaCl}_3$          | 150                                                         | $\text{GaCl}_4^-$                                                     |                                                             |                                                                 |                                                               |                                                                                    |
| 109                                                    | $\text{Ga}_2\text{Cl}_6$ |                                                             |                                                                       |                                                             |                                                                 | 110                                                           | $\text{Ga}_2\text{Cl}_3$                                                           |

\*Saturated with gallium metal

**Table S2** Calculated breathing mode Raman frequencies for the  $\text{Bi}_5^{3+}$  cluster together with CM, DCM, TCM and Bz benzene. For reference the experimental Raman frequency of the naked  $\text{Bi}_5^{3+}$  cluster in benzene solution is listed.<sup>[5a]</sup>

| Model system            | Raman bands ( $\text{cm}^{-1}$ ) |
|-------------------------|----------------------------------|
| $\text{Bi}_5^{3+}$ -CM  | 141/154                          |
| $\text{Bi}_5^{3+}$ -DCM | 140/153                          |
| $\text{Bi}_5^{3+}$ -TCM | 154                              |
| $\text{Bi}_5^{3+}$ -Bz  | 142/167                          |
| $\text{Bi}_5^{3+}$      | 139                              |

**Table S3** List of solvents used reactions; polarity and solubility of gallium(III) chloride.

| <b>Solvent</b>                                              | <b>Dielectric constant (20 °C unless otherwise indicated)</b> | <b>Solubility</b> | <b>Observation</b>                                                              |
|-------------------------------------------------------------|---------------------------------------------------------------|-------------------|---------------------------------------------------------------------------------|
| Hexane, C <sub>6</sub> H <sub>14</sub>                      | 1.890                                                         | < 50 mol %        | Light yellow colored solution                                                   |
| n-Heptane, C <sub>7</sub> H <sub>16</sub>                   | 1.92                                                          | < 50 mol%         | Light yellow colored solutions                                                  |
| Benzene, C <sub>6</sub> H <sub>6</sub>                      | 2.284                                                         | >50 mol%          | Amber colored solution                                                          |
| Toluene, C <sub>7</sub> H <sub>8</sub>                      | 2.379 (25 °C)                                                 | >50 mol%          | Amber colored solution                                                          |
| Chloroform, CHCl <sub>3</sub>                               | 4.806                                                         | >50 mol%          | Red/yellow solution                                                             |
| Tetrahydrofuran (THF), C <sub>4</sub> H <sub>8</sub> O      | 7.5 8 (25 °C)                                                 | >50 mol%          | Amber colored solution, grayish solid within minutes                            |
| Dichloromethane (DCM) CH <sub>2</sub> Cl <sub>2</sub> ,     | 9.08                                                          | >50 mol%          | Amber colored solution                                                          |
| Acetone, C <sub>3</sub> H <sub>6</sub> O                    | 20.7 (25 °C)                                                  | >50 mol%          | Heat release upon mixing, yellow/grayish solution                               |
| Acetonitrile, C <sub>2</sub> H <sub>3</sub> N               | 37.5                                                          | >50 mol%          | Heat release upon mixing, yellow/grayish solution gel like solid within minutes |
| Dimethylsulfoxide, (DMSO), C <sub>2</sub> H <sub>6</sub> OS | 46.7                                                          | >50 mol%          | Heat release upon mixing, yellowish solution, gel like solid within minutes     |

\*The polarity information (dielectric constants) found in CRC Handbook of Chemistry and Physics, 63<sup>rd</sup> edition, 1982-1983, CRC Press and in solvent supplier information.
